# Supplementary material for: Timing of gestational diabetes diagnosis, gestational weight gains and offspring growth trajectory: a prospective birth cohort study
Source: Springer Nature journal article supplement (doi:10.1186/s12884-023-05954-2), 2023-09-07
Supplement: MOESM1 [file 26015920]

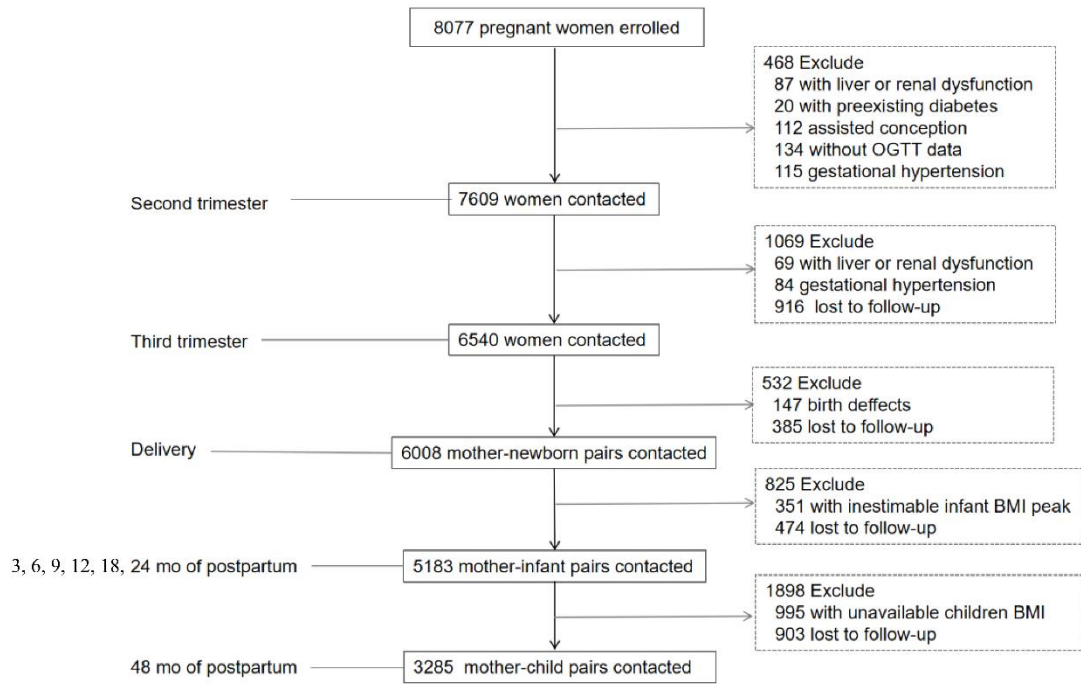

Figure S1. Flowchart illustrating enrolment for MIH study

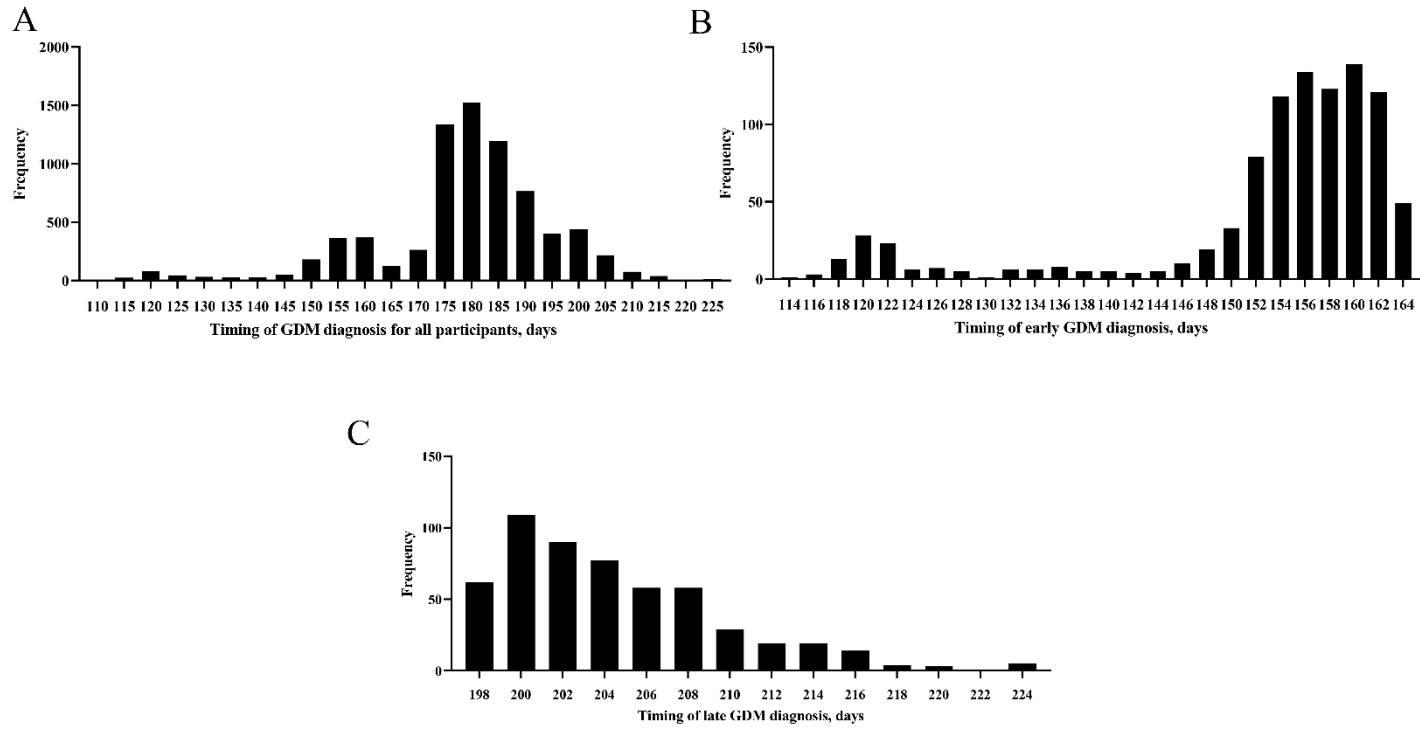

Figure S2. The distribution of the timing of GDM diagnosis

Table S1. Characteristics of the participants versus non-participant in the study.

| Characteristics                     | Participant<br>N=3285 | Non-participant<br>N=4324 | <i>P</i> value |
|-------------------------------------|-----------------------|---------------------------|----------------|
| <b>Mother</b>                       |                       |                           |                |
| Age, y                              | 29.17(3.50)           | 29.05(4.85)               | 0.152          |
| Prepregnancy BMI, kg/m <sup>2</sup> | 21.52(2.75)           | 21.61(3.08)               | 0.188          |
| Education ≤ 12 y                    | 2470(75.2)            | 3252(75.2)                | 0.986          |
| Household income < 4000 yuan        | 680(20.7)             | 774(17.9)                 | 0.002          |
| Multiparous                         | 1269(38.6)            | 1704(39.4)                | 0.517          |
| Early GWG rate, kg/wk               | 0.30(0.16)            | 0.29(0.17)                | 0.169          |
| Late GWG rate, kg/wk                | 0.52(0.31)            | 0.52(0.34)                | 0.698          |
| Total GWG rate, kg/wk               | 0.38(0.13)            | 0.38(0.13)                | 0.231          |
| Family history of diabetes          | 322(9.8)              | 402(9.3)                  | 0.500          |
| Physical exercise ≥ 3days/wk        | 1376(41.9)            | 1877(43.4)                | 0.198          |
| Folic acid supplement <1 times/d    | 2516(76.6)            | 3325(76.9)                | 0.754          |
| Calcium supplement <1 times/d       | 854(26.0)             | 1090(25.2)                | 0.408          |
| Iron supplement <1 times/d          | 198(6.0)              | 29(6.8)                   | 0.151          |
| <b>Infant<sup>#</sup></b>           |                       |                           |                |
| Birth weight, kg                    | 3.40(0.44)            | 3.40(0.47)                | 0.076          |
| Delivery gestational age, week      | 39.37(1.20)           | 39.36(1.43)               | 0.688          |
| Male sex                            | 1546(52.8)            | 1896(52.2)                | 0.657          |
| Vaginal delivery                    | 1935(66.1)            | 2418(66.6)                | 0.668          |

<sup>#</sup> Sample size of participants was 2929, sample size of non-participants was 3630.

Table S2. The association of maternal hsCRP and offspring development.

| Parameters                 | lg-hsCRP            |                |
|----------------------------|---------------------|----------------|
|                            | $\beta/OR$ (95% CI) | <i>P</i> value |
| <b>Fetus<sup>a</sup></b>   |                     |                |
| <b>BPD</b>                 |                     |                |
| Z-score                    | -0.03(-0.13,0.07)   | 0.512          |
| Overgrowth                 | 0.87(0.58,1.31)     | 0.509          |
| <b>AC</b>                  |                     |                |
| Z-score                    | -0.02(-0.16,0.12)   | 0.781          |
| Overgrowth                 | 1.02(0.85,1.24)     | 0.808          |
| <b>FL</b>                  |                     |                |
| Z-score                    | -0.05(-0.16,0.06)   | 0.348          |
| Overgrowth                 | 0.97(0.80,1.17)     | 0.735          |
| <b>Newborn<sup>b</sup></b> |                     |                |
| <b>Length</b>              |                     |                |
| Z-score                    | 0.07(-0.03,0.17)    | 0.158          |
| Overgrowth                 | 0.81(0.62,1.05)     | 0.103          |
| <b>Weight</b>              |                     |                |
| Z-score                    | 0.18(0.08, 0.27)    | <0.001         |
| LGA                        | 1.12(0.87, 1.44)    | 0.395          |
| <b>HC</b>                  |                     |                |
| Z-score                    | 0.23(0.10,0.36)     | <0.001         |
| Overgrowth                 | 1.57(1.19,2.07)     | 0.016          |
| <b>Infant<sup>c</sup></b>  |                     |                |
| Age at BMI peak            | 0.05(-0.14,0.23)    | 0.623          |
| Magnitude at BMI peak      | 0.17(0.01,0.33)     | 0.038          |
| Prepeak BMI velocity       | -0.01(-0.05,0.03)   | 0.785          |

Adjusted for maternal age, education, household income, prepregnancy BMI, total GWG rate, family history of diabetes, parity, the supplement of nutrients, as well as mode of delivery.
